# Supplementary material
Source: PubMed Central journal article supplement (PMC6026237)
Supplement: mmc1.pdf [file mmc1.pdf]

# Lung Function Trajectories in World Trade Center-Exposed New York City Firefighters Over 13 Years

## The Roles of Smoking and Smoking Cessation

*Thomas K. Aldrich, MD; Madeline Vossbrinck, MS; Rachel Zeig-Owens, DrPH; Charles B. Hall, PhD; Theresa M. Schwartz, MS; William Moir, MPH; Mayris P. Webber, DrPH; Hillel W. Cohen, DrPH; Anna Nolan, MD; Michael D. Weiden, MD; Vasilios Christodoulou, BA; Kerry J. Kelly, MD; and David J. Prezant, MD*

CHEST 2016; 149(6):1419-1427

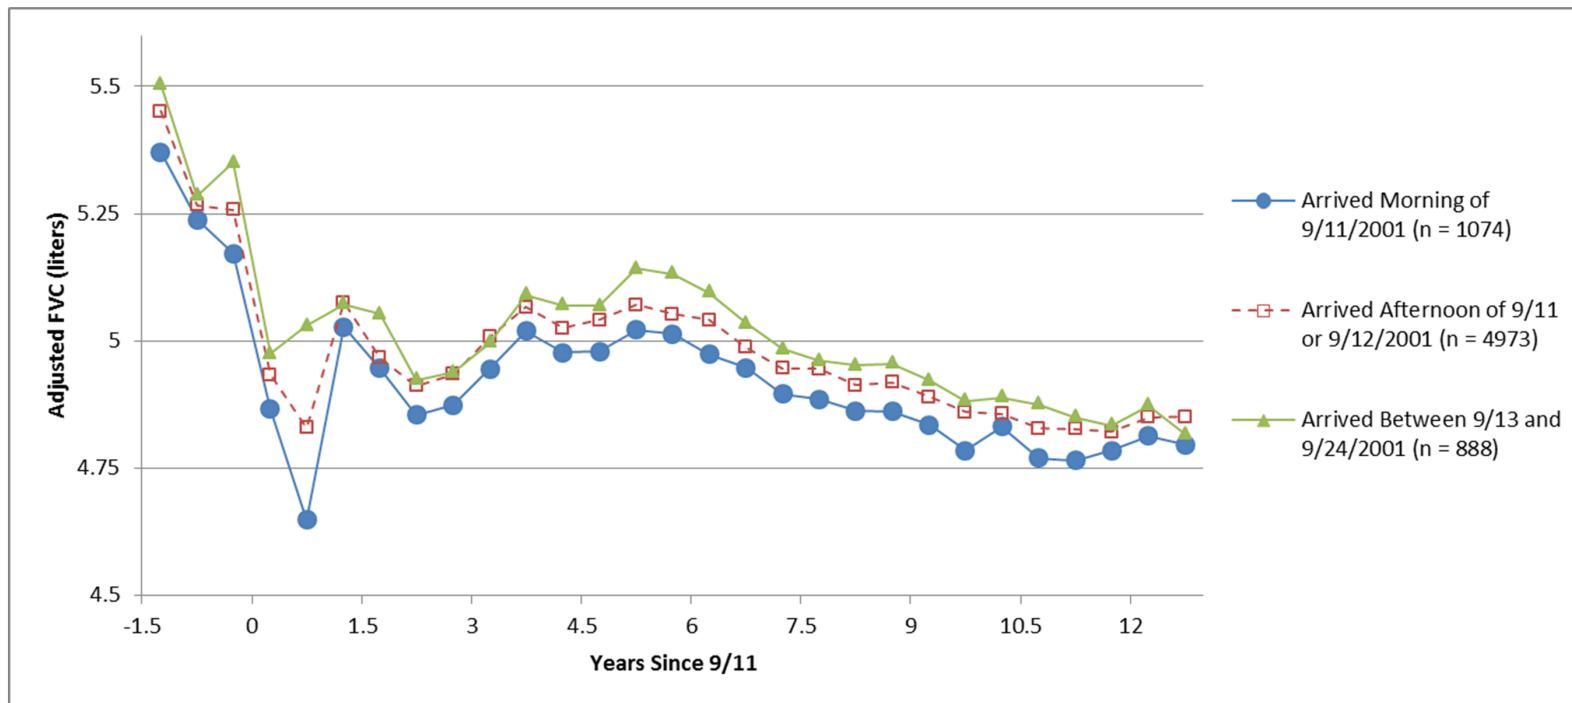

**e-Figure 1:** Forced Vital Capacity (FVC) by WTC Arrival Time. Average data for FVC, adjusted for race, age, and height, among never-smokers.

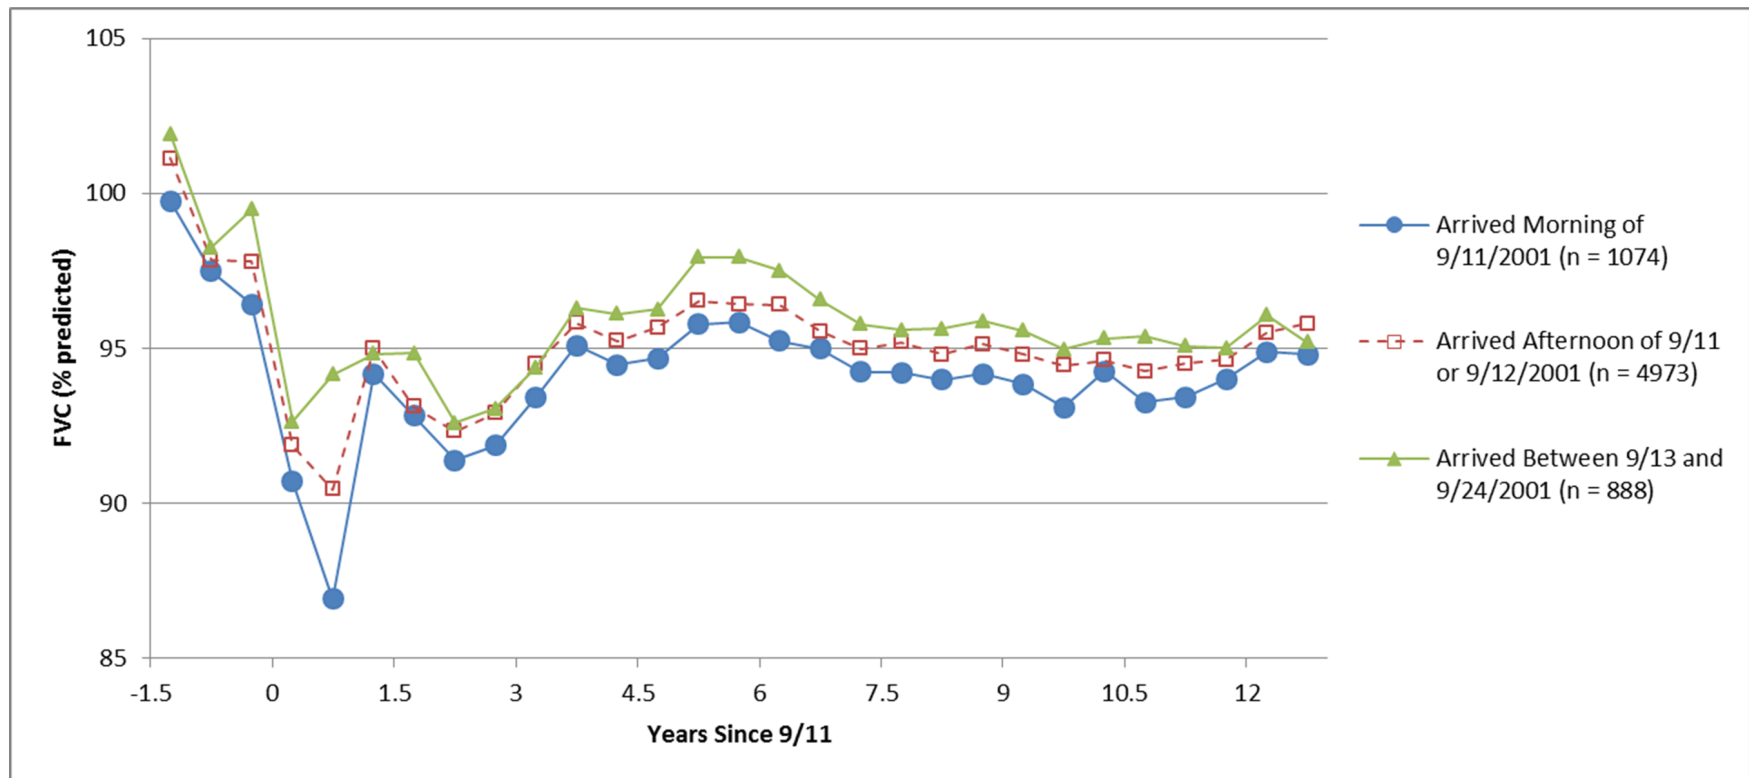

**e-Figure-2:** Percent-predicted Forced Vital Capacity (FVC) by WTC Arrival Time. Average data among never-smokers.

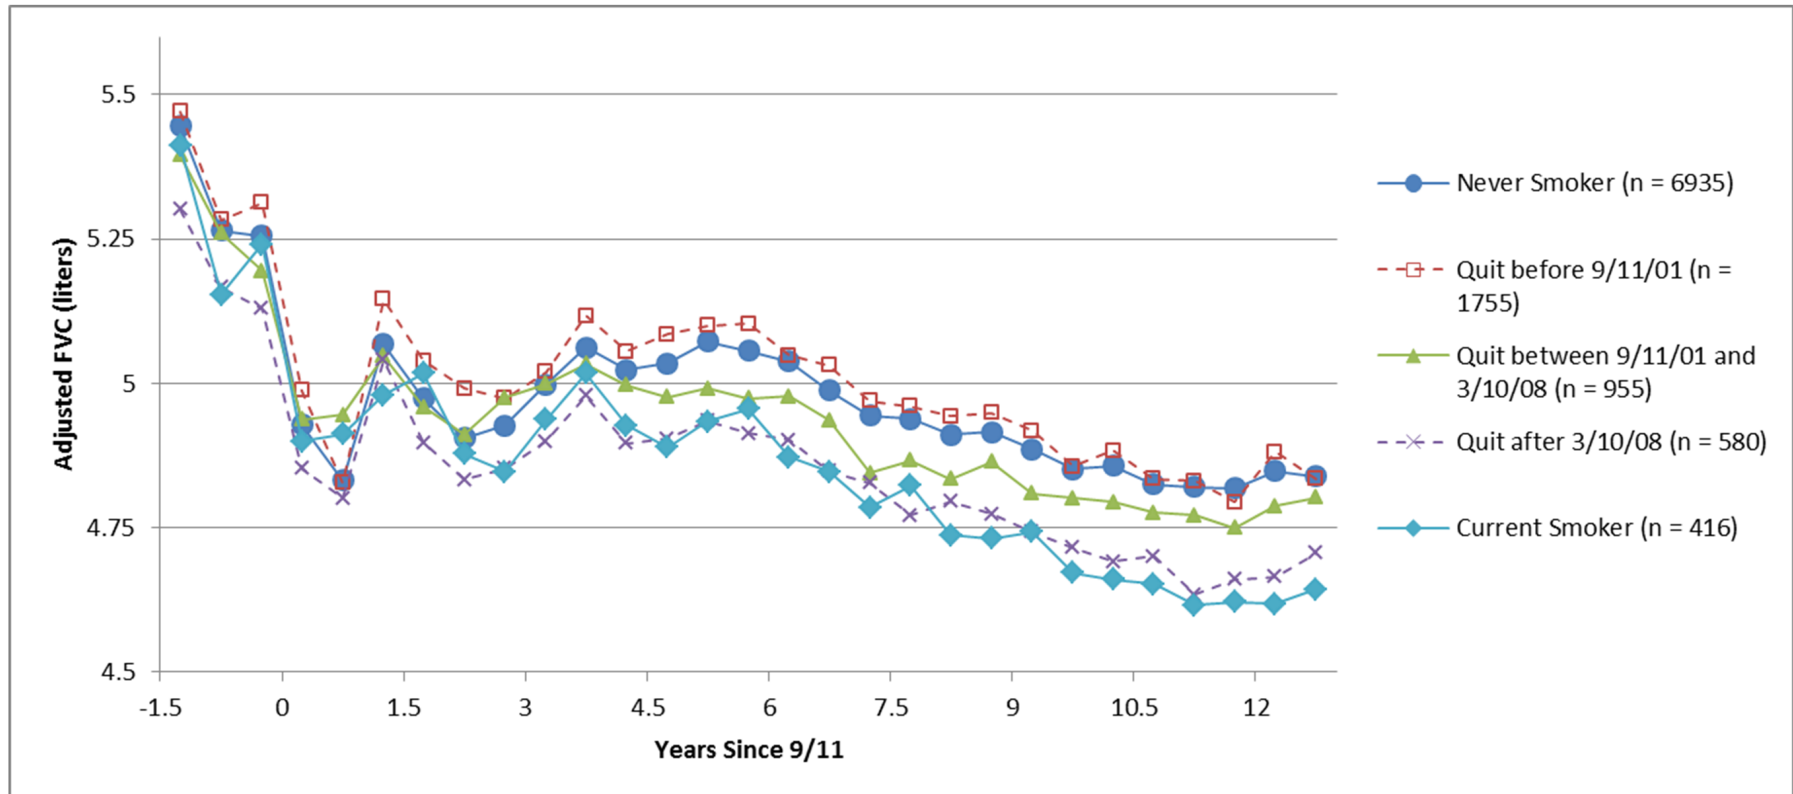

**e-Figure 3:** Forced Vital Capacity (FVC) by smoking status. Average data for FVC, adjusted for race, age, and height.

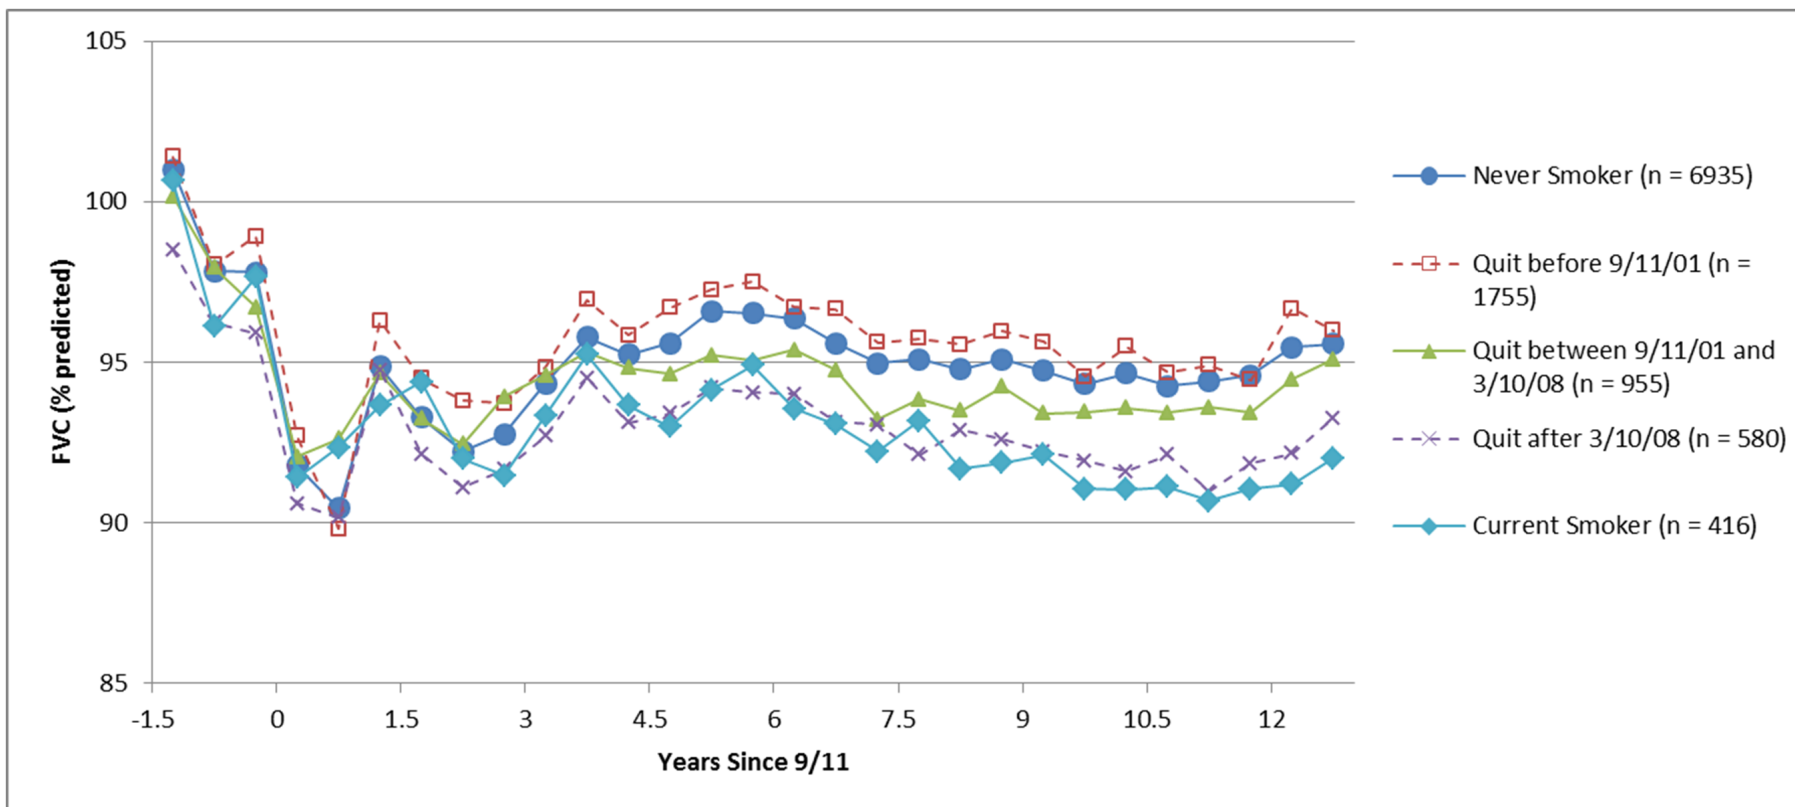

**e-Figure-4:** Percent-predicted Forced Vital Capacity (FVC) by smoking status.
